# Supplementary material
Source: publisher figshare collection journal article supplement (https://tandf.figshare.com/articles/dataset/_/9899135)
Supplement: Supplementary file 1 [file 1]

## Sheet: Supple table 1
Supplementary table 1	The individual detailed information of the delivered cases
	Age at pregnancy
	Height(cm)
	Body weight before pregnancy (kg)
	Body mass index (BMI) before pregnancy
	Weight gain during pregnancy (kg)
	Nullipara / Multipara
	Past pregnancy history
	No. of conception
	No. of delivery
	No. of miscarriage
	No. of stillbirth
	Marrital status
	Planned pregnancy
	Method of pregnancy
	Natural
	Assisted reproductive technology(IVF-ET, ICSI and Egg donation)
	Others
	Department of pregnancy management
	Only obstetrics
	Obstetrics and other department
	Others
	Outcome of prengnacy
	Live birth
	Stillbirth >22 weeks of gestation
	Miscarriage 12-21 weeks of gestation
	Mode of delivery
	Vaginal delivery
	Instrumental delivery
	Ceasarean section
	Indication of Ceasarean section
	Gestation weeks of delivery
	Neonatal weight at birth (g)
	Sex of neonate
	Amount of bleeding at delivery (g)
	For SLE
	Anti-phospholipid syndrome *
	The anti-Ro/SSA or anti-La/SSB antigen-antibody
	Hypertension
	Lupus nephritis (Past history / Active during pregnancy)
	For RA
	Anti-phospholipid syndrome
	The anti-Ro/SSA or anti-La/SSB antigen-antibody
	Interstitial lung disease
	For CD and UC
	Past history of abdominal surgery
	Perianal disease
	Colostomy
	Age of disease onset
	Disease status before conception ( active / remission)
	Disease status during pregnancy ( active / remission)
	Disease status of postpartum period ( active / remission)
	Complications during pregnancy
	Preeclampsia
	Superimposed preelampsia
	Eclampsia
	HELLP syndrome
	Placental abruption
	Preterm prelabor rupture of membranes
	Fetal growth restriction (<-1.5SD)
	Gestational diabetes mellitus
	Thromboembolism
	Miscarriage (12-21 weeks of gestation)
	Preterm delivery (22-36 weeks of gestation)
	Stillbirth
	Multiple pregnancy
	Obstetric DIC
	Chorioamnionitis
	Others
	Adverse events of neonate
	Neonetal death
	Admittion to the naonatal intensive care unit
	Neonatal respiratory distress
	Hypoglycemia
	Neonatal jaundice
	Low birth weight baby (<2500g)
	Structural abnormalities
	Chromosome abnormalities
	Neonatal lupus
	Congenital heart block
	Others
	Medication
	Before pregnancy	During pregnancy	Postpartum period
	Prednisolone	Prednisolone	Prednisolone
	NSAIDｓ	NSAIDｓ	NSAIDｓ
	Methotrexate	Methotrexate	Methotrexate
	Cyclosporine	Cyclosporine	Cyclosporine
	Tacrolimus	Tacrolimus	Tacrolimus
	Leflunomide	Leflunomide	Leflunomide
	Azathioprine	Azathioprine	Azathioprine
	Salazosulfapyridine	Salazosulfapyridine	Salazosulfapyridine
	Mesalamine	Mesalamine	Mesalamine
	Tofacitinib	Tofacitinib	Tofacitinib
	Mycophenolate mofetil	Mycophenolate mofetil	Mycophenolate mofetil
	Mizoribine	Mizoribine	Mizoribine
	Infliximab	Infliximab	Infliximab
	Etanercept	Etanercept	Etanercept
	Adalimumab	Adalimumab	Adalimumab
	Golimumab	Golimumab	Golimumab
	Certolizumab	Certolizumab	Certolizumab
	Tocilizumab	Tocilizumab	Tocilizumab
	Abatacept	Abatacept	Abatacept
	ARB or ACE inhibitors**	ARB or ACE inhibitors**	ARB or ACE inhibitors**
	Methyldopa	Methyldopa	Methyldopa
	Hydralazine	Hydralazine	Hydralazine
	Beta-blockers	Beta-blockers	Beta-blockers
	Calcium channel blockers	Calcium channel blockers	Calcium channel blockers
	Warfarin	Warfarin	Warfarin
	Heparin	Heparin	Heparin
	Aspirin	Aspirin	Aspirin
	Others	Others	Others
	* According to the revised Sapporo APS Classification Criteria
	**ARB;Angiotensin II receptor blockers, ACE inhibitors;Angiotensin-converting enzyme inhibitors

## Sheet: Sheet1
妊娠時年齢			Age at pregnancy
職業
嗜好品(妊娠中）
最終学歴
既往歴（複数の場合はセルに直接記入）
家族歴（父母）（複数の場合はセルに直接記入）
家族歴（兄弟）（複数の場合はセルに直接記入）
身長(cm)			Height(cm)
妊娠前体重(kg)			Body weight before pregnancy (kg)
BMI			Body mass index (BMI) before pregnancy
妊娠中体重 増加(kg)			Weight gain during pregnancy (kg)
初産経産			Nullipara / Multipara
既往妊娠歴	経妊回数	Past pregnancy history	No. of conception
	経産回数		No. of delivery
	流産回数		No. of miscarriage
	死産回数		No. of stillbirth
妊娠時 婚姻状態			Marrital status
計画的妊娠			Planned pregnancy
妊娠方法			Method of pregnancy
今回の妊娠管理			Department of pregnancy management (Only obstetrics / Obstetrics and other department / Others )
今回の 妊娠転帰			Outcome of prengnacy (live birth / stillbirth >22 weeks of gestation/ miscarriage 12-21 weeks of gestation)
分娩方法			Mode of delivery ( Vaginal delivery / Instrumental delivery / Ceasarean section)
分娩方法がCSの場合の適応			Indication of Ceasarean section
分娩週数	週		Gestation weeks of delivery
	日
出生 体重(g)			Neonatal weight at birth (g)
児の性別			Sex of neonate
分娩時 出血量(g)			Bleeding at delivery
疾患の詳細（妊娠前/妊娠時初発の場合発症時）	抗リン脂質抗体症候群（Sapporo criteria,2006シドニー改変に準拠 (LA、抗CLβ2GP1抗体、抗CLIgG/IgM）)		Anti-phospholipid syndrome (According to the revised Sapporo APS Classification Criteria)	抗リン脂質抗体症候群（Sapporo criteria,2006シドニー改変に準拠 (LA、抗CLβ2GP1抗体、抗CLIgG/IgM）)	Anti-phospholipid syndrome (According to the revised Sapporo APS Classification Criteria)	腹部手術歴	Past history of abdominal surgery
	抗SSA抗体		The anti-Ro/SSA or anti-La/SSB antigen-antibody	抗SSA抗体	The anti-Ro/SSA or anti-La/SSB antigen-antibody	肛門病変	Perianal disease
	抗SSB抗体			抗SSB抗体		人工肛門	Colostomy
	高血圧		Hypertension	間質性肺炎	interstitial lung disease
	ループス腎炎（既往および妊娠中の活動性）		Lupus nephritis (Past history and non-active during pregnancy / Active during pregnancy)
	発症年齢		Age of disease onset
妊娠前の病勢			Disease status before conception ( active / remission)
妊娠中の病勢			Disease status during pregnancy ( active / remission)
分娩後の病勢			Disease status of postpartum period ( active / remission)
妊娠分娩異常	①	Complications during pregnancy	なし	妊娠高血圧	妊娠高血圧腎症（重症、早発）	妊娠高血圧腎症（重症、遅発）	妊娠高血圧腎症（軽症、早発）	妊娠高血圧腎症（軽症、遅発）	加重型妊娠高血圧腎症	子癇	HELLP症候群	常位胎盤早期剥離	pPROM	FGR	GDM	血栓塞栓症	流産（～12週）	流産（12週～）	早産（22週～）	死産（22週～）	多胎	DIC	子宮内感染
	②
	③選択肢にない疾患、3個以上ある場合はこのセルに全て記載		Preeclampsia	Superimposed preelampsia	Eclampsia	HELLP syndrome	Placental abruption	Preterm prelabor rupture of membranes	Fetal growth restriction (<-1.5SD)	Gestational diabetes mellitus	Thromboembolism	Miscarriage (12-21 weeks of gestation)	Preterm delivery (22-36 weeks of gestation)	Stillbirth	Multiple pregnancy	Obstetric DIC	Chorioamnionitis	Others
新生児異常	①	Adverse events of neonate	新生児死亡	NICU収容	呼吸障害	低血糖	黄疸	低出生体重児	胎児構造異常（内容を記載）	染色体異常	新生児ループス	先天性心ブロック
	②
	③選択肢にない疾患、3個以上ある場合はこのセルに全て記載		Neonetal death	Admittion to the naonatal intensive care unit	Neonatal respiratory distress	Hypoglycemia	Neonatal jaundice	Low birth weight baby (<2500g)	Structural abnormalities	Chromosome abnormalities	Neonatal lupus	Congenital heart block	Others
薬物治療 挙児希望前	①		プレドニゾロン（プレドニン、ソル・メドロール）	NSAIDｓ（ロキソニン、ボルタレン等）	メトトレキサート（メソトレキセート、リウマトレックス）	シクロスポリン（ネオーラル、サンディミュン）	タクロリムス（グラセプター）	レフルノミド（アラバ）	アザチオプリン（イムラン、アザニン）	サラゾスルファピリジン（アザルフィジン)	メサラジン（ペンタサ、アサコール）	トファシチニブ（ゼルヤンツ）	ミコフェノールモフェチル（セルセプト）	ミゾリビン（ブレディニン）	インフリキシマブ（レミケード）	エタネルセプト（エンブレル）	アダリムマブ（ヒュミラ）	ゴリムマブ（シンポニー）	セルトリズマブ（シムジア）	トシリズマブ（アクテムラ）	アバタセプト（オレンシア）	ARB、ACE阻害剤	αメチルドパ	ヒドララジン	β遮断薬	Ca拮抗薬	ワルファリン	ヘパリン	バイアスピリン	その他の薬剤（名称を記載 ）
	②	Medication before conception	prednisolone	NSAIDｓ	Methotrexate	Cyclosporine	Tacrolimus	Leflunomide	Azathioprine	Salazosulfapyridine	Mesalamine	Tofacitinib	Mycophenolate mofetil		Infliximab	Etanercept	Adalimumab	Golimumab	Certolizumab	Tocilizumab	Abatacept	Angiotensin-converting enzyme inhibitors or Angiotensin II receptor blockers	Methyldopa	Hydralazine	Beta-blockers	Calcium channel blockers	Warfarin	Heparin	Aspirin	Others
	③選択肢にない薬剤、 3個以上ある場合はこのセルに全て記載	Medication during pregnancy	prednisolone	NSAIDｓ	Methotrexate	Cyclosporine	Tacrolimus	Leflunomide	Azathioprine	Salazosulfapyridine	Mesalamine	Tofacitinib	Mycophenolate mofetil		Infliximab	Etanercept	Adalimumab	Golimumab	Certolizumab	Tocilizumab	Abatacept	Angiotensin-converting enzyme inhibitors or Angiotensin II receptor blockers	Methyldopa	Hydralazine	Beta-blockers	Calcium channel blockers	Warfarin	Heparin	Aspirin	Others
薬物治療 妊娠判明前	①	Medication of postpartum period	prednisolone	NSAIDｓ	Methotrexate	Cyclosporine	Tacrolimus	Leflunomide	Azathioprine	Salazosulfapyridine	Mesalamine	Tofacitinib	Mycophenolate mofetil		Infliximab	Etanercept	Adalimumab	Golimumab	Certolizumab	Tocilizumab	Abatacept	Angiotensin-converting enzyme inhibitors or Angiotensin II receptor blockers	Methyldopa	Hydralazine	Beta-blockers	Calcium channel blockers	Warfarin	Heparin	Aspirin	Others
	②
	③選択肢にない薬剤、 3個以上ある場合はこのセルに全て記載
薬物治療 妊娠初期	①
	②
	③選択肢にない薬剤、 3個以上ある場合はこのセルに全て記載
薬物治療 妊娠中期	①
	②
	③選択肢にない薬剤、 3個以上ある場合はこのセルに全て記載
薬物治療 妊娠後期	①
	②
	③選択肢にない薬剤、 3個以上ある場合はこのセルに全て記載
薬物治療 分娩後	①
	②
	③選択肢にない薬剤、 3個以上ある場合はこのセルに全て記載
	授乳の有無
特記事項（自由記載）
